# Supplementary material for: La3+’s Effect on the Surface (101) of Anatase for Methylene Blue Dye Removal, a DFT Study
Source: MDPI journal article supplement (doi:10.3390/molecules27196370), 2022-09-27
Supplement: s1 [file s1]

# La<sup>3+</sup> Effect on the Surface (101) of Anatase for Methylene Blue Dye Removal, a DFT Study

Ximena Jaramillo-Fierro \*, Sneyder Gaona and Eduardo Valarezo

Departamento de Química, Facultad de Ciencias Exactas y Naturales, Universidad Técnica Particular de Loja, San Cayetano Alto, Loja 1101608, Ecuador

\* Correspondence: xvjaramillo@utpl.edu.ec; Tel.: +593-7-3701444

**Abstract:** Density functional theory (DFT) is a widely used method for studying matter at the quantum level. In this study, the surface (101) of TiO<sub>2</sub> (anatase phase) was considered to develop DFT calculations and explain the effect of lanthanum ion (La<sup>3+</sup>) on the electronic properties, adsorption capacity, and photocatalytic activity of this semiconductor. Due to the presence of the La<sup>3+</sup> ion, the bandgap energy value of La/TiO<sub>2</sub> (2.98 eV) was lower than that obtained for TiO<sub>2</sub> (3.21 eV). TDOS analysis demonstrated the presence of hybrid levels in La/TiO<sub>2</sub> composed mainly of O2p and La5d orbitals. The chemical nature of the La-O bond was estimated from PDOS analysis, Bader charge analysis, and ELF function, resulting in a polar covalent type, due to the combination of covalent and ionic bonds. In general, the adsorption of the methylene blue (MB) molecule on the surface (101) of La/TiO<sub>2</sub> was energetically more favorable than on the surface (101) of TiO<sub>2</sub>. The thermodynamic stability of doping TiO<sub>2</sub> with lanthanum was deduced from the negative heat-segmentation values obtained. The evidence from this theoretical study supports the experimental results reported in the literature and suggests that the semiconductor La/TiO<sub>2</sub> is a potential catalyst for applications that require sunlight.

**Citation:** Jaramillo-Fierro, X.; Gaona, S.; Valarezo, E. La<sup>3+</sup>'s Effect on the Surface (101) of Anatase for Methylene Blue Dye Removal, a DFT Study. *Molecules* **2022**, *27*, 6370. <https://doi.org/10.3390/molecules27196370>

Academic Editors: Pierfrancesco Cerruti and Arash Moeini

Received: 3 September 2022

Accepted: 23 September 2022

Published: 27 September 2022

**Keywords:** DFT calculations; anatase; lanthanum; adsorption; methylene blue

**Publisher's Note:** MDPI stays neutral with regard to jurisdictional claims in published maps and institutional affiliations.

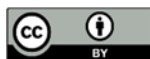

**Copyright:** © 2022 by the authors. Licensee MDPI, Basel, Switzerland. This article is an open access article distributed under the terms and conditions of the Creative Commons Attribution (CC BY) license (<https://creativecommons.org/licenses/by/4.0/>).

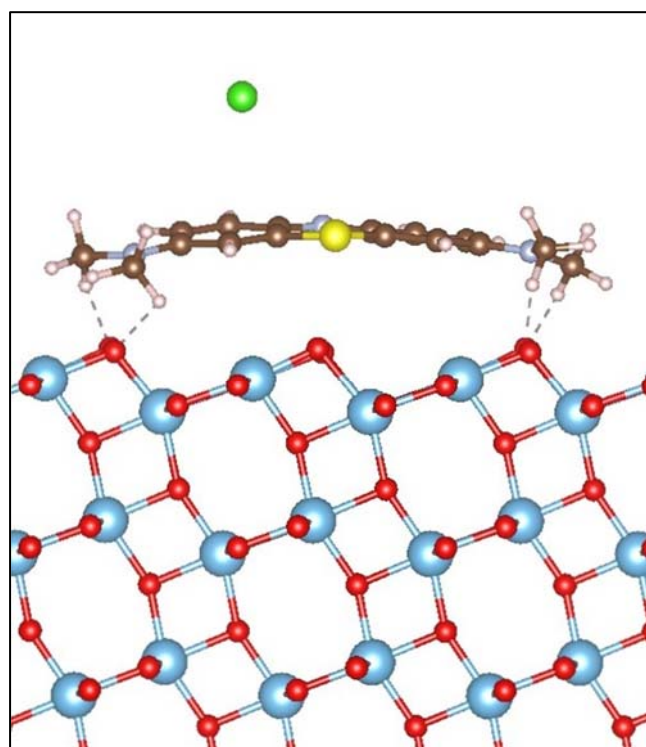

**Figure S1.** Aromatic ring of MB bent slightly on the surface (101) of TiO<sub>2</sub>.

**Table S1.** Bader's charge analysis of the optimized MB molecule free and adsorbed on TiO<sub>2</sub> and La/TiO<sub>2</sub> surfaces.

| No. | Atom | TiO <sub>2</sub> surface |                                        |                               | La/TiO <sub>2</sub> surface |                                               |                               |
|-----|------|--------------------------|----------------------------------------|-------------------------------|-----------------------------|-----------------------------------------------|-------------------------------|
|     |      | MB<br>Charge (-<br>e)    | MB-TiO <sub>2</sub><br>Charge (-<br>e) | Difference<br>Charge (-<br>e) | MB<br>Charge (-<br>e)       | MB-<br>La/TiO <sub>2</sub><br>Charge (-<br>e) | Difference<br>Charge (-<br>e) |
| 1   | C    | -0.072                   | -0.016                                 | 0.056                         | -0.979                      | 0.013                                         | 0.992                         |
| 2   | C    | 1.195                    | 1.044                                  | -0.151                        | 1.275                       | 1.094                                         | -0.181                        |
| 3   | C    | 1.377                    | -0.034                                 | -1.411                        | 0.771                       | 0.115                                         | -0.656                        |
| 4   | C    | -0.214                   | -0.097                                 | 0.117                         | -0.026                      | -0.149                                        | -0.123                        |
| 5   | C    | -1.515                   | -0.062                                 | 1.454                         | -1.446                      | -0.321                                        | 1.126                         |
| 6   | C    | 1.164                    | 1.336                                  | 0.172                         | 0.822                       | 1.107                                         | 0.285                         |
| 7   | C    | -0.301                   | -0.294                                 | 0.007                         | -0.251                      | -0.201                                        | 0.050                         |
| 8   | C    | -0.022                   | 0.094                                  | 0.116                         | -0.710                      | 0.208                                         | 0.918                         |
| 9   | C    | 1.186                    | 1.088                                  | -0.098                        | 0.860                       | 0.912                                         | 0.053                         |
| 10  | C    | -0.063                   | -0.202                                 | -0.140                        | -0.931                      | -0.055                                        | 0.876                         |
| 11  | C    | -0.256                   | 0.162                                  | 0.418                         | 0.026                       | 0.182                                         | 0.156                         |
| 12  | C    | 1.128                    | 1.352                                  | 0.225                         | 0.092                       | 1.085                                         | 0.993                         |
| 13  | C    | 0.175                    | 0.689                                  | 0.515                         | 0.053                       | 0.738                                         | 0.685                         |
| 14  | C    | 0.209                    | 0.716                                  | 0.507                         | 0.005                       | 0.658                                         | 0.653                         |
| 15  | C    | 0.271                    | 0.616                                  | 0.346                         | 0.240                       | 0.740                                         | 0.501                         |
| 16  | C    | 0.382                    | 0.778                                  | 0.396                         | 0.260                       | 0.789                                         | 0.529                         |
| 17  | S    | 0.575                    | 0.267                                  | -0.308                        | 0.618                       | 0.306                                         | -0.312                        |
| 18  | N    | -2.373                   | -2.674                                 | -0.301                        | -2.214                      | -2.649                                        | -0.435                        |
| 19  | N    | -2.301                   | -2.417                                 | -0.116                        | -2.025                      | -2.452                                        | -0.427                        |
| 20  | N    | -2.277                   | -2.431                                 | -0.154                        | -2.406                      | -2.530                                        | -0.124                        |
| 21  | CL   | -0.942                   | -0.374                                 | 0.567                         | -0.789                      | -0.629                                        | 0.160                         |

---

|    |   |       |        |        |       |        |        |
|----|---|-------|--------|--------|-------|--------|--------|
| 22 | H | 0.215 | 0.090  | −0.124 | 1.000 | 0.100  | −0.900 |
| 23 | H | 0.264 | 0.276  | 0.012  | 0.122 | −0.031 | −0.153 |
| 24 | H | 0.283 | 0.041  | −0.243 | 1.000 | 0.185  | −0.815 |
| 25 | H | 0.307 | 0.077  | −0.231 | 1.000 | 0.027  | −0.974 |
| 26 | H | 0.158 | 0.058  | −0.100 | 0.999 | 0.051  | −0.948 |
| 27 | H | 0.155 | 0.190  | 0.035  | 0.994 | −0.096 | −1.090 |
| 28 | H | 0.173 | 0.024  | −0.149 | 0.195 | 0.024  | −0.171 |
| 29 | H | 0.161 | 0.047  | −0.114 | 0.134 | −0.004 | −0.138 |
| 30 | H | 0.213 | 0.032  | −0.181 | 0.166 | 0.058  | −0.108 |
| 31 | H | 0.107 | 0.009  | −0.098 | 0.131 | 0.056  | −0.076 |
| 32 | H | 0.123 | 0.037  | −0.086 | 0.152 | 0.047  | −0.105 |
| 33 | H | 0.071 | 0.060  | −0.011 | 0.158 | 0.033  | −0.125 |
| 34 | H | 0.024 | 0.065  | 0.042  | 0.063 | 0.015  | −0.049 |
| 35 | H | 0.101 | 0.044  | −0.056 | 0.090 | 0.048  | −0.042 |
| 36 | H | 0.048 | 0.080  | 0.032  | 0.098 | 0.033  | −0.065 |
| 37 | H | 0.098 | 0.056  | −0.042 | 0.176 | 0.030  | −0.146 |
| 38 | H | 0.104 | 0.040  | −0.064 | 0.122 | −0.001 | −0.123 |
| 39 | H | 0.069 | −0.030 | −0.099 | 0.155 | 0.029  | −0.126 |

---
